1 **Integrated genomic and histopathological analysis of low grade serous ovarian carcinoma**  
2 **identifies clinically distinct disease subtypes**

3 John P Thomson<sup>1a</sup>, Robert L Hollis<sup>1a</sup>, Juliette van Baal<sup>2a</sup>, Narthana Ilenkovan<sup>1</sup>, Michael  
4 Churchman<sup>1</sup>, Koen van de Vijver<sup>2</sup>, Frederike Dijk<sup>3</sup>, Alison M Meynert<sup>4</sup>, Clare Bartos<sup>1</sup>, Tzyvia  
5 Rye<sup>1</sup>, Ian Croy<sup>1</sup>, Patricia Diana<sup>1</sup>, Mignon van Gent<sup>3</sup>, Helen Creedon<sup>5</sup>, Rachel Nirsimloo<sup>5</sup>, Fiona  
6 Nussey<sup>5</sup>, Christianne Lok<sup>2b</sup>, C. Simon Herrington<sup>1,b</sup> and Charlie Gourley<sup>1,b</sup>

7 <sup>1</sup>Nicola Murray Centre for Ovarian Cancer Research, Cancer Research UK Edinburgh Centre,  
8 MRC Institute of Genetics and Cancer, University of Edinburgh, Edinburgh, UK

9 <sup>2</sup>Department of Gynaecologic Oncology and Department of Pathology, The Netherlands Cancer  
10 Institute, Antoni van Leeuwenhoek, Amsterdam, The Netherlands

11 <sup>3</sup>Department of Gynaecologic Oncology and Department of Pathology, Amsterdam University  
12 Medical Centres, Amsterdam, The Netherlands

13 <sup>4</sup>MRC Human Genetics Unit, MRC Institute of Genetics and Cancer, University of Edinburgh,  
14 Edinburgh, UK

15 <sup>5</sup>Edinburgh Cancer Centre, Western General Hospital, Edinburgh, UK.

16 <sup>a,b</sup>Authors contributed equally

17

18 **Corresponding Author(s):** Professor Charlie Gourley - Nicola Murray Centre for Ovarian  
19 Cancer Research, Cancer Research UK Edinburgh Centre, MRC IGC, University of Edinburgh.  
20 Crewe Road South, Edinburgh, EH4 2XU, UK. email: [charlie.gourley@ed.ac.uk](mailto:charlie.gourley@ed.ac.uk).

21

22

23

24

25 **Abstract**

26 **Background.**

27 Low-grade serous ovarian carcinoma (LGSOC) is a distinct, under-investigated and relatively  
28 chemotherapy-resistant ovarian cancer type. Understanding the molecular landscape is crucial  
29 to maximise the impact of molecularly-targeted therapy.

30 **Methods**

31 Whole exome sequencing and copy number data were integrated with histopathological patterns,  
32 ER/PR expression, and detailed clinical annotation, including survival, in a carefully curated  
33 LGSOC cohort.

34 **Results**

35 63 tumours were analysed in the largest comprehensive genomic LGSOC study to date. Three  
36 genomic subgroups were identified: canonical MAPK mutant (cMAPKm: 52%,  
37 *KRAS/BRAF/NRAS*), MAPK-associated mutation (27%, 14 MAPK-associated genes) and MAPK  
38 wild-type (MAPKwt: 21%). MAPKwt patients were younger at diagnosis (median 47 versus 62  
39 years in the cMAPKm subgroup) and demonstrated shorter survival [multivariable HR (mHR)  
40 4.17]. The inferior survival in the MAPKwt subgroup was due to shorter post-relapse survival  
41 (mHR 5.22) rather than shorter time to first progression (mHR 1.15). Patients in the MAPK-  
42 associated mutation subgroup had similar survival to cMAPKm cases. The cMAPKm subgroup  
43 more frequently demonstrated macropapillary invasion. Desmoplasia and micropapillary invasion  
44 were independently associated with poor survival. NOTCH pathway activation occurred  
45 independently of MAPK subgroup.

46 **Conclusions**

47 LGSOC comprises multiple genomic subgroups with distinct clinical, molecular and  
48 histopathological features. True MAPKwt cases represent around a fifth of patients: they are  
49 younger but have poorer survival. New therapeutic strategies with activity in this subgroup are  
50 urgently required. NOTCH inhibitors represent a therapeutic strategy worthy of exploration.

51

52

## 53 Introduction

54 Low grade serous ovarian carcinoma (LGSOC) is an uncommon (<5%) and under-investigated  
55 ovarian cancer type, in some cases arising from serous borderline tumours [1]. In contrast to high  
56 grade serous ovarian cancers (HGSOCs), LGSOCs are *TP53* wild-type, do not demonstrate  
57 genomic instability or homologous recombination repair deficiency and frequently harbour  
58 classical activating mutations in canonical MAPK pathway components (*KRAS*, *BRAF* and  
59 *NRAS*) [2-5]. LGSOCs typically display high oestrogen receptor (ER) expression, with expression  
60 of progesterone receptor (PR) in a subset of cases [6].

61 LGSOC often affects younger women (median 47 years) [7]. The response rate to platinum-  
62 based chemotherapy is 5-25% [8, 9], compared to 70-80% in HGSOCs. Relapsed LGSOC  
63 follows a more indolent course than relapsed HGSOC, demonstrating prolonged post-relapse  
64 survival [10, 11]. Appreciation of LGSOC as a separate entity has driven a management shift  
65 away from the conventional 'one size fits all' approach to ovarian cancer treatment, with  
66 endocrine therapy showing significant activity [12, 13]. Recently, the MEK inhibitor trametinib  
67 also demonstrated notable efficacy, delaying disease progression in the context of LGSOC  
68 recurrence compared to standard of care therapies [14, 15]. Another MEK inhibitor binimetinib,  
69 while not demonstrating superiority to standard of care chemotherapy, did show an overall  
70 response rate of 16% with a suggestion that patients whose tumours harboured activating *KRAS*  
71 mutations were more likely to respond [16].

72 Until recently, genomic characterisation of LGSOC had been limited to targeted sequencing of  
73 selected genes [3, 4, 17-19] or whole exome sequencing of a small number of cases (n=8, n=9,  
74 n=22) [5, 17, 20]. Most recently, a targeted sequencing study of 71 LGSOC cases [19] identified  
75 mutation of *KRAS*, *BRAF* or *NRAS* in 47% of cases, alongside further less common potentially  
76 actionable mutations.

77 Here we investigate whether comprehensive genomic characterisation of LGSOC can be  
78 implemented to stratify LGSOC cases into clinically meaningful subgroups. We perform whole  
79 exome sequencing (WES) on tumour material from 63 LGSOC patients, identifying genomic  
80 subgroups centred around the MAPK pathway. These subgroups demonstrate significant  
81 differences in patient age, clinical outcome and histopathological features; we identify patient  
82 groups more likely to experience long-term survival, and highlight high-risk patient groups for  
83 which new treatment strategies are required to improve outcome.

84

## 85 **Methods**

### 86 **Ethical approval**

87 Ethical approval was obtained from the Lothian Human Annotated Bioresource (reference  
88 15/ES/0094-SR925), NKI-AVL Translational Research Board (reference CFMPB284), and  
89 University of Amsterdam AMC Biobank Assessment Committee (reference 2016\_070#A201641).  
90 All participants provided written informed consent or had consent waived by the ethics committee  
91 due to the retrospective nature of the study.

### 92 **Cohort identification and pathology review**

93 Cases were identified from local databases. All cases underwent expert gynaecological  
94 pathology review (KvdV, CSH). Cases were excluded if: WT1 negative; aberrant p53  
95 expression; no definitive stromal invasion; *TP53* gene mutation.

### 96 **Assessment of histopathological patterns in LGSOC**

97 H&E-stained sections underwent secondary review to identify the presence of desmoplasia and  
98 the macropapillary (MaP) and micropapillary (MiP) patterns of invasion[22]. MaP was defined as  
99 stromal invasion by papillary structures containing fibrovascular cores[22]; MiP was defined as  
100 invasion by papillary structures without fibrovascular cores.

### 101 **Clinical data**

102 Baseline patient characteristics, treatment information and outcome data were retrieved from  
103 local databases and from patient file review. Disease-specific survival (DSS) was calculated from  
104 the date of confirmed ovarian cancer (OC) diagnosis.

### 105 **Whole exome sequencing, variant calling and analysis**

106 Following DNA extraction from macrodissected FFPE sections (Supplementary Methods 1),  
107 exome capture was performed using the Illumina TruSeq Exome Library Prep kit and WES was  
108 performed on the Illumina NextSeq 550 (Illumina, Inc., San Diego, CA, USA). Samples failed  
109 sequencing QC if mean on-target coverage was <30X. Data were aligned to the GRCh38 human  
110 reference genome using bwa-0.7.17[29], duplicates marked and base quality scores recalibrated  
111 with the GenomeAnalysisToolkit (GATK) v4[30] within the bcbio 1.0.6 pipeline (Supplementary  
112 Methods 2). Variants were called using a majority vote system from three callers (VarDict[31],  
113 Mutect2[32] and Freebayes[33]) and were filtered to remove common and likely non-functional  
114 variation. Analysis of variants and oncogenic pathways was performed using the R package  
115 maftools[34]. Functional tumour mutational burden (fTMB) was calculated as the number of  
116 mutations present following filtering. CNV analysis was carried out using a custom script utilising  
117 the Python package multiBamSummary, comparing read normalised 10kb binned scores  
118 between in house “normal” buffy coat derived sample datasets and LGSOC samples. For more  
119 information on these analyses see Supplementary Methods 3-6.

120 **Immunohistochemistry for ER and PR**

121 Immunohistochemistry for ER and PR was performed using protocol F on the Leica BOND III  
122 Autostainer (Supplementary Methods 7). ER immunohistochemistry used rabbit anti-ER antibody  
123 M3643 clone EP1; PR immunohistochemistry used mouse anti-PR antibody M3569 clone PgR-  
124 636. Nuclear expression was quantified using histoscore, generated by multiplying the proportion  
125 of positive tumour nuclei (0 – 100%) by the intensity of nuclear staining (0 – 3) to produce  
126 weighted scores from 0 to 300[35]. Two independent observers scored digital images of stained  
127 slides, demonstrating excellent agreement ( $\rho=0.96$  for PR,  $\rho=0.93$  for ER) (Supplementary  
128 Methods 7). Final patient histoscore was calculated as the mean score of the two observers.

129 **Statistical analysis**

130 Statistical analyses were performed using R version 4.0.3. The Mann Whitney-U test or T-test  
131 were used to compare continuous data, as appropriate. Survival analyses were performed using  
132 the Cox proportional hazards regression analysis in the Survival package. Univariable survival  
133 analyses are presented as hazard ratios (HRs) alongside 95% confidence intervals. Multivariable  
134 analyses are presented similarly, detailing multivariable hazard ratios (mHRs). Median follow-up  
135 time was calculated using the reverse Kaplan-Meier method. Comparisons of frequency were  
136 performed using the Chi-squared test or Fisher's exact test, as appropriate.

137 **Data availability**

138 The genomic data presented in this manuscript are being made available via deposition in the  
139 European Genome-Phenome Archive.

140

141

142

## 143 **Results**

### 144 **Cohort characteristics**

145 118 LGSOC cases were identified. 41 cases were excluded for insufficient tumour material or  
146 cellularity; 3 failed DNA quality control; 5 had insufficient sequencing coverage. 69 cases  
147 underwent genomic characterisation by WES. 6 cases harbouring *TP53* mutations were  
148 excluded as potential occult HGSOE, leaving 63 cases in the final LGSOC study cohort (Figure  
149 S1). The median per-sample on-target coverage in the study cohort was 64X (range 32X-132X).

150 Clinical characteristics of the LGSOC study cohort are summarized in Table 1. The median  
151 follow-up time was 13.3 years. All patients underwent cytoreductive surgery. The median  
152 disease-specific survival (DSS) was 12.9 years.

### 153 **Genomic features identify subgroups of low grade serous ovarian carcinoma**

154 WES identified canonical MAPK pathway mutations in 33 cases (52.4%) (cMAPKm subgroup):  
155 24 *KRAS* (38.1%), 6 *BRAF* (9.5%) and 3 *NRAS* (4.8%) (Figures 1, S2, S3), which occurred  
156 mutually exclusively. The majority of these events occurred at known mutational hotspots (83%  
157 of *KRAS* G12R/C/D/V, 100% *BRAF* V600E, 100% *NRAS* Q61R/K) (Figure S4).

158 Pathway analysis of mutated genes revealed a further 17 cases (27.0%) with perturbation of the  
159 MAPK/RAS pathway by mutations across 14 other MAPK-associated genes defined by the  
160 TCGA PanCanAtlas [21] (MAPK-associated mutations) (Figures 1 S5). These events were  
161 largely mutually exclusive (co-occurrence in 1 case), and genomic events in these genes seldom  
162 occurred in cMAPKm cases (co-occurrence in 2 cases). The total frequency of MAPK/RAS  
163 pathway alteration was 50 of 63 cases (79.4%) (33 cMAPKm, 17 MAPK-associated mutations).

164 A further 13 cases were MAPK wild-type (MAPKwt). These patients demonstrated significantly  
165 younger age at diagnosis compared to cMAPKm cases (median 47 vs 62 years,  $P=0.048$ )  
166 (Figures 1, 2A & Table S1).

167 NOTCH pathway perturbation was also common (21.0% of cases), occurring both in the context  
168 of MAPK/RAS pathway alteration (34.0%, 17/50) and in MAPKwt cases (30.8%, 4/13) (Figure  
169 S5). Recurrent gene targets of mutation beyond MAPK pathway components included *ATM* (5  
170 cases, 7.9%), *USP9X* (5 cases, 7.9%) and *EIF1AX* (3 cases, 4.8%) (Figures 1, S3). There was  
171 significant co-occurrence between *NRAS* and *EIF1AX* mutation ( $P=0.005$ ).

172

173

174 **Copy number alterations in low grade serous carcinoma**

175 Across the cohort, loss of all or part of chromosome 19 (chr19) was common (22 cases (34.9%):  
176 p and q arms; 6 cases (9.5%): p arm; 2 cases (3.2%): q arm). Chr19p loss was most frequent in  
177 MAPKwt cases (9 of 13 cases, 69.2%), but this was not statistically significantly higher than in  
178 the cMAPKm group ( $P=0.056$ ) (Figure S6).

179 Gain of the q arm of chr1 occurred in 19 cases (30.2%), while loss of the p arm of chr1 occurred  
180 in 13 cases (20.6%). Gain of the q arm of chr8 was also common (16 cases, 25.4%). In  
181 agreement with previous reports, four cases (6.3%) demonstrated copy number loss specifically  
182 over the *USP9X* locus.

183

184 **Histopathological patterns in low grade serous carcinoma**

185 A MiP pattern of invasion was identified in 38 cases (60.3%), while a MaP invasion pattern was  
186 identified in 23 cases (36.5%) (Figure 1)[22]. The MiP and MaP patterns were largely mutually  
187 exclusive ( $P<0.0001$ , co-occurrence in only 3 cases). 5 cases demonstrated neither MaP nor MiP  
188 pattern. The MaP pattern was more common in cMAPKm cases (54.5%) compared to MAPKwt  
189 (23.1%;  $p=0.004$ ; Figure 2B).

190 Desmoplasia was identified in 40 cases (63.5%). Desmoplasia was associated with advanced  
191 stage at diagnosis (92.5%, 37 of 40 desmoplastic cases with FIGO III/IV vs 50.0%, 11 of 22  
192 evaluable non-desmoplastic cases with FIGO III/IV;  $P<0.001$ ). Desmoplasia was also associated  
193 with the presence of macroscopic RD (67.5%, 27 of 40 desmoplastic cases demonstrated  
194 macroscopic RD vs 33.3%, 14 of 21 evaluable non-desmoplastic cases,  $P=0.015$ ) (Figures 2C,  
195 3A, 3B).

196

197 **ER and PR expression in low grade serous carcinoma**

198 LGSOC samples stained uniformly for ER (histoscore  $\geq 50$  in 60 of 61 evaluable cases, 98.4%; 2  
199 non-evaluable) (Figure S7A). Median ER and PR histoscores were 220 (range 7.5-300) and 50  
200 (range 0-295) respectively (Figure S7A and S7B). Analysis of ER and PR levels across the  
201 genomic classes revealed higher levels of PR expression in the MAPKwt subgroup (median PR  
202 histoscore 105) (Figure 2D, Figure S7C), but this was not significantly higher compared to the  
203 cMAPKm and MAPK-associated subgroups (median PR histoscore 45 and 35,  $P=0.083$ ).

204 Desmoplastic tumours demonstrated significantly lower PR expression (median histoscore 30 vs  
205 110, Bonferroni-adjusted  $P=0.003$ ) (Figure 3C) than non-desmoplastic tumours.

206

## 207 **Features associated with outcome in low grade serous carcinoma**

208 Patients with LGSOC demonstrating desmoplasia experienced significantly shorter DSS (HR for  
209 no desmoplasia 0.18, 95% CI 0.05-0.62) (Figures 4A, S8A); the MiP pattern was also associated  
210 with poor DSS (HR for absence of MiP 0.29, 95% CI 0.10-0.86) (Figures 4B, S8B). Conversely,  
211 high PR expression was associated with significantly prolonged survival (HR for PR histoscore  
212  $\geq 50$  0.23, 95% CI 0.09-0.60) (Figures 4C, S8C).

213 Multivariable analysis of LGSOC features (genomic subgroup, PR status, MiP pattern and  
214 desmoplasia) accounting for clinicopathological variables identified the MAPKwt subgroup  
215 (multivariable HR [mHR] for cMAPKm vs MAPKwt 0.24, 95% CI 0.07-0.79), desmoplastic cases  
216 (mHR for absence of desmoplasia 0.20, 95% CI 0.04-0.89) and the MiP pattern (mHR for  
217 absence of MiP=0.27, 95% CI 0.08-0.91) as independently associated with shorter DSS (Figure  
218 4D, Table S2). PR status was not independently associated with significantly longer DSS (mHR  
219 0.38, 95% CI 0.12-1.14).

220 Further endpoint analysis suggested that inferior DSS in the MAPKwt group was due to shorter  
221 post-relapse survival (mHR 5.22, 95% CI 1.20-22.67) rather than rapid disease progression  
222 following first-line treatment (mHR 1.15, 95% CI 0.43-3.08).

## 223 **Discussion**

224 LGSOC affects younger women than HGSOC and demonstrates greater intrinsic  
225 chemoresistance. Although survival is better than HGSOC, patients frequently relapse resulting  
226 in morbidity from largely ineffectual therapies and premature mortality. As such, better  
227 (molecular) characterization and new therapies are urgently required.

228 Few studies have performed molecular characterisation of robustly curated LGSOC cohorts.  
229 Where molecular profiling studies have been performed, these have been limited to panel based  
230 sequencing of selected genes [3, 18, 19], or have included only a small number of patient  
231 samples [5, 20]. Few of these studies have used immunohistochemistry for WT1/p53 to confirm  
232 LGSOC diagnosis. Here we report comprehensive genomic profiling by WES, integrating these  
233 data with histopathological analysis, clinical data and assessment of ER and PR expression  
234 patterns in a sizeable LGSOC cohort.

235 52% of cases harboured mutations in the canonical MAPK pathway components *KRAS*, *BRAF*  
236 and *NRAS*. This cMAPKm group more frequently demonstrated the MaP pattern of invasion,  
237 represented older patients (median 62 years) and was associated with more favourable DSS and  
238 post-relapse survival. These data are consistent with previously reported favourable survival in  
239 LGSOC patients with tumours harbouring *KRAS* or *BRAF* mutations identified by targeted  
240 sequencing [3]. Our data suggest that this survival benefit is due to prolonged post-relapse  
241 survival.



242 While the rate of cMAPK<sub>m</sub> within our LGSOC cohort (52%) is similar to that reported in previous  
243 targeted sequencing studies [17, 19] and WES of small LGSOC cohorts [20], we also identified a  
244 further 27% of cases (MAPK-associated group) demonstrating mutational disruption of genes  
245 related to the MAPK pathway [21]; these cases demonstrated a survival profile similar to that of  
246 the cMAPK<sub>m</sub> cases. The remaining MAPK<sub>w</sub>t cases (21%) represented patients with younger age  
247 at diagnosis (median 47 years) and who experienced shorter survival. This suggests that  
248 previous observations of poorer survival in younger LGSOC patients may be underpinned by  
249 differences in disease biology between younger and older patients [23]. MAPK<sub>w</sub>t cases often  
250 demonstrated the MiP pattern of invasion (62%), with only 23% demonstrating the MaP pattern.

251 While different histopathological patterns of invasion (MaP and MiP) were associated with the  
252 genomic subgroups, we demonstrate that the MiP pattern is independently associated with  
253 shorter survival time (mHR 3.76). We also demonstrate that the presence of desmoplasia is  
254 associated with poorer outcome (mHR 5.10), independent of its relationship with more advanced  
255 stage disease and residual disease status.

256 Both the GOG281/LOGS and MILO studies suggested that the response rates to MEK inhibition  
257 were greater in patients with canonical MAPK defects [14, 16]. However, to date, no assessment  
258 of relative MEK inhibitor efficacy has been made with regard to MAPK pathway mutations  
259 beyond *KRAS/BRAF/NRAS*; future work should seek to quantify efficacy within these patients,  
260 and should determine whether patients with no identifiable genomic MAPK defect (MAPK<sub>w</sub>t)  
261 derive any benefit from MEK inhibition.

262 Beyond the MAPK pathway, analysis of genomic events from our WES data suggest perturbation  
263 of the NOTCH signalling pathway is common, affecting a notable proportion of cases both with  
264 and without MAPK defects (34% and 31%, respectively). NOTCH pathway inhibition may  
265 therefore represent a novel therapeutic strategy for LGSOC patients with intrinsic or acquired  
266 resistance to chemotherapy and/or MEK inhibitors.

267 We report the first investigation using WES in a sizeable LGSOC cohort (n=63) with detailed  
268 clinical annotation and extensive follow-up. The use of immunohistochemistry for WT1 and p53  
269 status to robustly curate our cohort, represents a major strength of this work. However, while our  
270 dataset represents one of the largest LGSOC collections reported to date, the overall cohort size  
271 remains modest due to the rarity of LGSOC. Confirmatory studies characterising the behaviour of  
272 the described genomic subgroups, and associations with age, histopathological features and  
273 outcome, are therefore required.

274 Collectively, our data identify a subgroup of LGSOC with mutations in MAPK pathway  
275 components beyond *KRAS*, *BRAF* and *NRAS*. Alongside the cMAPK<sub>m</sub> subgroup, these cases  
276 demonstrate more favourable outcome when compared to MAPK<sub>w</sub>t patients, who are younger at

277 diagnosis. The MaP pattern of invasion is a potential histopathological indicator of cMAPKm  
278 LGSOC. Desmoplasia and the MiP pattern are features independently associated with survival.

279

## 280 **Acknowledgements**

281 Funding: RLH was supported by Target Ovarian Cancer. This work was funded in part by a  
282 HANARTH Foundation grant. We extend our thanks to The Nicola Murray Foundation for their  
283 generous support of The Nicola Murray Centre for Ovarian Cancer Research. JT and CB were  
284 supported by core funding from the CRUK Edinburgh Centre. AMM was supported by core  
285 funding awarded to the MRC Human Genetics Unit.

286 We are grateful to the NHS Lothian Department of Pathology, Edinburgh Experimental Cancer  
287 Medicine Centre, the Edinburgh Ovarian Cancer Database and the NRS Lothian Human  
288 Annotated Bioresource for their ongoing support. The high throughput sequencing described  
289 here was supported by the Edinburgh Clinical Research Facility, Western General Hospital,  
290 Edinburgh, UK. We would like to acknowledge the NKI- AVL Core Facility Molecular Pathology &  
291 Biobanking (CFMPB) for supplying NKI-AVL Biobank material and providing laboratory support.

## 292 **Declaration of interest statement:**

293 RLH: consultancy fees from GlaxoSmithKline. FN: non-personal interests in AstraZeneca and  
294 Tesaro. CG: research funding from Roche, AstraZeneca, Novartis, Aprea, Nucana, GSK, Tesaro,  
295 BerGen Bio, Medannexin, Verastem; honoraria/consultancy fees Roche, AstraZeneca, MSD,  
296 GSK, Tesaro, Nucana, Clovis, Foundation One, Chugai, Sierra Oncology, Cor2Ed and Takeda;  
297 named on issued/pending patents related to predicting treatment response in ovarian cancer  
298 outside the scope of the work described here. All other authors declare no conflicts of interest.

299

## 300 References

- 301 [1] Shih Ie M, Kurman RJ. Ovarian tumorigenesis: a proposed model based on morphological  
302 and molecular genetic analysis. *Am J Pathol.* 2004;164:1511-8.
- 303 [2] Cheasley D, Nigam A, Zethoven M, Hunter S, Etemadmoghadam D, Semple T, et al.  
304 Genomic analysis of low-grade serous ovarian carcinoma to identify key drivers and therapeutic  
305 vulnerabilities. *J Pathol.* 2020.
- 306 [3] Gershenson DM, Sun CC, Wong KK. Impact of mutational status on survival in low-grade  
307 serous carcinoma of the ovary or peritoneum. *Br J Cancer.* 2015;113:1254-8.
- 308 [4] Hunter SM, Anglesio MS, Ryland GL, Sharma R, Chiew YE, Rowley SM, et al. Molecular  
309 profiling of low grade serous ovarian tumours identifies novel candidate driver genes.  
310 *Oncotarget.* 2015;6:37663-77.
- 311 [5] Jones S, Wang TL, Kurman RJ, Nakayama K, Velculescu VE, Vogelstein B, et al. Low-grade  
312 serous carcinomas of the ovary contain very few point mutations. *J Pathol.* 2012;226:413-20.
- 313 [6] Sieh W, Kobel M, Longacre TA, Bowtell DD, deFazio A, Goodman MT, et al. Hormone-  
314 receptor expression and ovarian cancer survival: an Ovarian Tumor Tissue Analysis consortium  
315 study. *Lancet Oncol.* 2013;14:853-62.
- 316 [7] Gershenson DM, Bodurka DC, Lu KH, Nathan LC, Milojevic L, Wong KK, et al. Impact of Age  
317 and Primary Disease Site on Outcome in Women With Low-Grade Serous Carcinoma of the  
318 Ovary or Peritoneum: Results of a Large Single-Institution Registry of a Rare Tumor. *J Clin*  
319 *Oncol.* 2015;33:2675-82.
- 320 [8] Grabowski JP, Harter P, Heitz F, Pujade-Lauraine E, Reuss A, Kristensen G, et al. Operability  
321 and chemotherapy responsiveness in advanced low-grade serous ovarian cancer. An analysis of  
322 the AGO Study Group metadatabase. *Gynecol Oncol.* 2016;140:457-62.
- 323 [9] Schmeler KM, Sun CC, Bodurka DC, Deavers MT, Malpica A, Coleman RL, et al.  
324 Neoadjuvant chemotherapy for low-grade serous carcinoma of the ovary or peritoneum. *Gynecol*  
325 *Oncol.* 2008;108:510-4.
- 326 [10] Gershenson DM, Sun CC, Lu KH, Coleman RL, Sood AK, Malpica A, et al. Clinical behavior  
327 of stage II-IV low-grade serous carcinoma of the ovary. *Obstet Gynecol.* 2006;108:361-8.
- 328 [11] Irodi A, Rye T, Herbert K, Churchman M, Bartos C, Mackean M, et al. Patterns of  
329 clinicopathological features and outcome in epithelial ovarian cancer patients: 35 years of  
330 prospectively collected data. *Bjog.* 2020;127:1409-20.
- 331 [12] Gershenson DM. Current advances in the management of malignant germ cell and sex cord-  
332 stromal tumors of the ovary. *Gynecol Oncol.* 2012;125:515-7.
- 333 [13] Gershenson DM, Bodurka DC, Coleman RL, Lu KH, Malpica A, Sun CC. Hormonal  
334 Maintenance Therapy for Women With Low-Grade Serous Cancer of the Ovary or Peritoneum. *J*  
335 *Clin Oncol.* 2017;35:1103-11.
- 336 [14] Gershenson DM, Miller A, Brady W, Paul J, Carty K, Rodgers W, et al. LBA61 - A  
337 randomized phase II/III study to assess the efficacy of trametinib in patients with recurrent or  
338 progressive low-grade serous ovarian or peritoneal cancer. *Annals of Oncology.* 2019;30:v897-  
339 v8.
- 340 [15] Gershenson DM, Miller A, Brady WE, Paul J, Carty K, Rodgers W, et al. Trametinib versus  
341 standard of care in patients with recurrent low-grade serous ovarian cancer (GOG 281/LOGS): a  
342 randomised, open-label phase 2/3 trial. *The Lancet.* In press.
- 343 [16] Monk BJ, Grisham RN, Banerjee S, Kalbacher E, Mirza MR, Romero I, et al. MILO/ENGOT-  
344 ov11: Binimetinib Versus Physician's Choice Chemotherapy in Recurrent or Persistent Low-  
345 Grade Serous Carcinomas of the Ovary, Fallopian Tube, or Primary Peritoneum. *J Clin Oncol.*  
346 2020;38:3753-62.
- 347 [17] Hunter SM, Anglesio MS, Ryland GL, Sharma R, Chiew YE, Rowley SM, et al. Molecular  
348 profiling of low grade serous ovarian tumours identifies novel candidate driver genes.  
349 *Oncotarget.* 2015;6:37663-77.
- 350 [18] Emmanuel C, Chiew YE, George J, Etemadmoghadam D, Anglesio MS, Sharma R, et al.  
351 Genomic classification of serous ovarian cancer with adjacent borderline differentiates RAS  
352 pathway and TP53-mutant tumors and identifies NRAS as an oncogenic driver. *Clinical cancer*  
353 *research : an official journal of the American Association for Cancer Research.* 2014;20:6618-30.
- 354 [19] Cheasley D, Nigam A, Zethoven M, Hunter S, Etemadmoghadam D, Semple T, et al.  
355 Genomic analysis of low-grade serous ovarian carcinoma to identify key drivers and therapeutic  
356 vulnerabilities. *The Journal of pathology.* 2021;253:41-54.

- 357 [20] Etemadmoghadam D, Azar WJ, Lei Y, Moujaber T, Garsed DW, Kennedy CJ, et al. EIF1AX  
358 and NRAS Mutations Co-occur and Cooperate in Low-Grade Serous Ovarian Carcinomas.  
359 *Cancer Res.* 2017;77:4268-78.
- 360 [21] Sanchez-Vega F, Mina M, Armenia J, Chatila WK, Luna A, La KC, et al. Oncogenic  
361 Signaling Pathways in The Cancer Genome Atlas. *Cell.* 2018;173:321-37.e10.
- 362 [22] Yemelyanova A, Mao TL, Nakayama N, Shih IM, Kurman RJ. Low-grade serous carcinoma  
363 of the ovary displaying a macropapillary pattern of invasion. *Am J Surg Pathol.* 2008;32:1800-6.
- 364 [23] Gershenson DM, Bodurka DC, Lu KH, Nathan LC, Milojevic L, Wong KK, et al. Impact of age  
365 and primary disease site on outcome in women with low-grade serous carcinoma of the ovary or  
366 peritoneum: Results of a large single-institution registry of a rare tumor. *Journal of Clinical  
367 Oncology.* 2015;33:2675-82.
- 368 [24] Slomovitz B, Gourley C, Carey MS, Malpica A, Shih IM, Huntsman D, et al. Low-grade  
369 serous ovarian cancer: State of the science. *Gynecol Oncol.* 2020;156:715-25.
- 370 [25] Gershenson DM. Low-grade serous carcinoma of the ovary or peritoneum. *Ann Oncol.*  
371 2016;27 Suppl 1:i45-i9.
- 372 [26] Langdon SP, Herrington CS, Hollis RL, Gourley C. Estrogen Signaling and Its Potential as a  
373 Target for Therapy in Ovarian Cancer. *Cancers (Basel).* 2020;12.
- 374 [27] Marchetti C, De Felice F, Ergasti R, Scambia G, Fagotti A. Letrozole in the management of  
375 advanced ovarian cancer: an old drug as a new targeted therapy. *Int J Gynecol Cancer.*  
376 2020;30:1058-64.
- 377 [28] Gershenson DM, Sun CC, Iyer RB, Malpica AL, Kavanagh JJ, Bodurka DC, et al. Hormonal  
378 therapy for recurrent low-grade serous carcinoma of the ovary or peritoneum. *Gynecol Oncol.*  
379 2012;125:661-6.
- 380 [29] Li H, Durbin R. Fast and accurate long-read alignment with Burrows-Wheeler transform.  
381 *Bioinformatics (Oxford, England).* 2010;26:589-95.
- 382 [30] McKenna A, Hanna M, Banks E, Sivachenko A, Cibulskis K, Kernysky A, et al. The Genome  
383 Analysis Toolkit: a MapReduce framework for analyzing next-generation DNA sequencing data.  
384 *Genome research.* 2010;20:1297-303.
- 385 [31] Lai Z, Markovets A, Ahdesmaki M, Chapman B, Hofmann O, McEwen R, et al. VarDict: a  
386 novel and versatile variant caller for next-generation sequencing in cancer research. *Nucleic  
387 Acids Res.* 2016;44:e108.
- 388 [32] Cibulskis K, Lawrence MS, Carter SL, Sivachenko A, Jaffe D, Sougnez C, et al. Sensitive  
389 detection of somatic point mutations in impure and heterogeneous cancer samples. *Nat  
390 Biotechnol.* 2013;31:213-9.
- 391 [33] Garrison E, Marth G. Haplotype-based variant detection from short-read sequencing. *arXiv  
392 preprint.* 2012;arXiv:1207.3907 [q-bio.GN].
- 393 [34] Mayakonda A, Lin DC, Assenov Y, Plass C, Koeffler HP. Maftools: efficient and  
394 comprehensive analysis of somatic variants in cancer. *Genome Res.* 2018;28:1747-56.
- 395 [35] Kirkegaard T, Edwards J, Tovey S, McGlynn LM, Krishna SN, Mukherjee R, et al. Observer  
396 variation in immunohistochemical analysis of protein expression, time for a change?  
397 *Histopathology.* 2006;48:787-94.

398

399

400

401 **Table 1.** Clinical characteristics of low grade serous ovarian carcinoma cases.

|                                        |                                                 | <b>N</b>   | <b>%</b>         |
|----------------------------------------|-------------------------------------------------|------------|------------------|
| <b>Cases</b>                           | Total                                           | 63         |                  |
| <b>Age</b>                             | Median                                          | 54 years   | Range 19-66      |
| <b>Centre</b>                          | Edinburgh Cancer Centre                         | 31         | 49.2             |
|                                        | University of Amsterdam Academic Medical Centre | 10         | 15.9             |
|                                        | Netherlands Cancer Institute                    | 22         | 34.9             |
| <b>FIGO stage</b>                      | I                                               | 9          | 14.5             |
|                                        | II                                              | 5          | 8.1              |
|                                        | III                                             | 39         | 62.9             |
|                                        | IV                                              | 9          | 14.5             |
|                                        | NA                                              | 1          | -                |
| <b>RD following cytoreduction</b>      | Macroscopic RD                                  | 34         | 55.7             |
|                                        | No macroscopic RD                               | 27         | 44.3             |
|                                        | Unknown RD status                               | 2          | -                |
| <b>Neoadjuvant chemo</b>               | No                                              | 48         | 76.2             |
|                                        | Yes                                             | 15         | 23.8             |
| <b>Macropapillary invasion pattern</b> | No                                              | 40         | 63.5             |
|                                        | Yes                                             | 23         | 36.5             |
| <b>Micropapillary invasion pattern</b> | No                                              | 25         | 29.7             |
|                                        | Yes                                             | 38         | 60.3             |
| <b>Desmoplasia</b>                     | No                                              | 23         | 36.5             |
|                                        | Yes                                             | 40         | 63.5             |
| <b>Diagnosis period</b>                | Pre-2000                                        | 10         | 15.9             |
|                                        | 2000s                                           | 24         | 38.1             |
|                                        | 2010 onward                                     | 29         | 46.0             |
| <b>Death details at last follow-up</b> | Alive                                           | 25         | 39.7             |
|                                        | Died of OC                                      | 21         | 33.3             |
|                                        | Died of other causes                            | 9          | 14.3             |
|                                        | Died, unknown cause                             | 8          | 12.7             |
| <b>Outcome</b>                         | 5-year DSS                                      | 70.6%      | 95% CI 59.1-84.4 |
|                                        | Median follow-up                                | 13.3 years | 95% CI 6.36-NA   |

402 FIGO, International Federation of Gynecology and Obstetrics; NA, not available; RD, residual  
 403 disease; OC, ovarian carcinoma; DSS, disease-specific survival

404

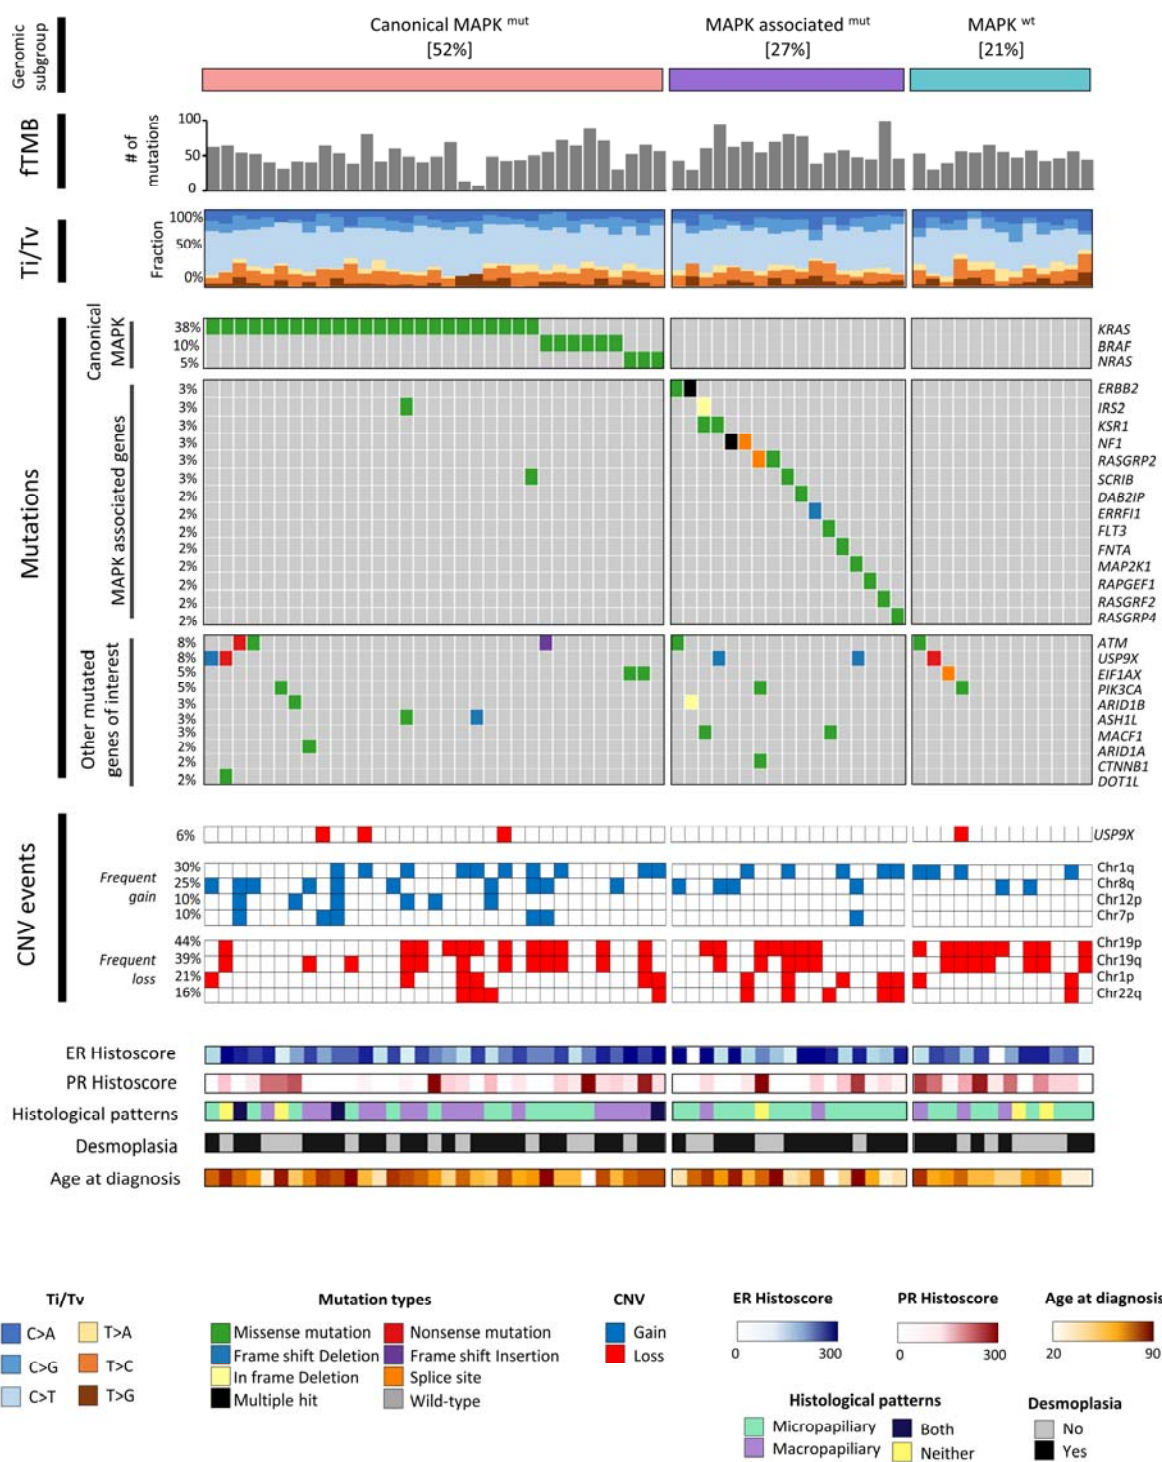

405

406 Figure 1: Molecular landscape of low grade serous ovarian carcinoma. ftMB, functional tumour  
 407 mutational burden; Ti, transitions; Tv, transversions; SNV, single nucleotide variant; CNV, copy  
 408 number variant ; cMAPK<sub>m</sub>, canonical MAPK pathway mutation (KRAS/BRAF/NRAS); MAPK-  
 409 assoc, MAPK-associated mutation; MAPK<sub>wt</sub>, MAPK pathway wild-type.

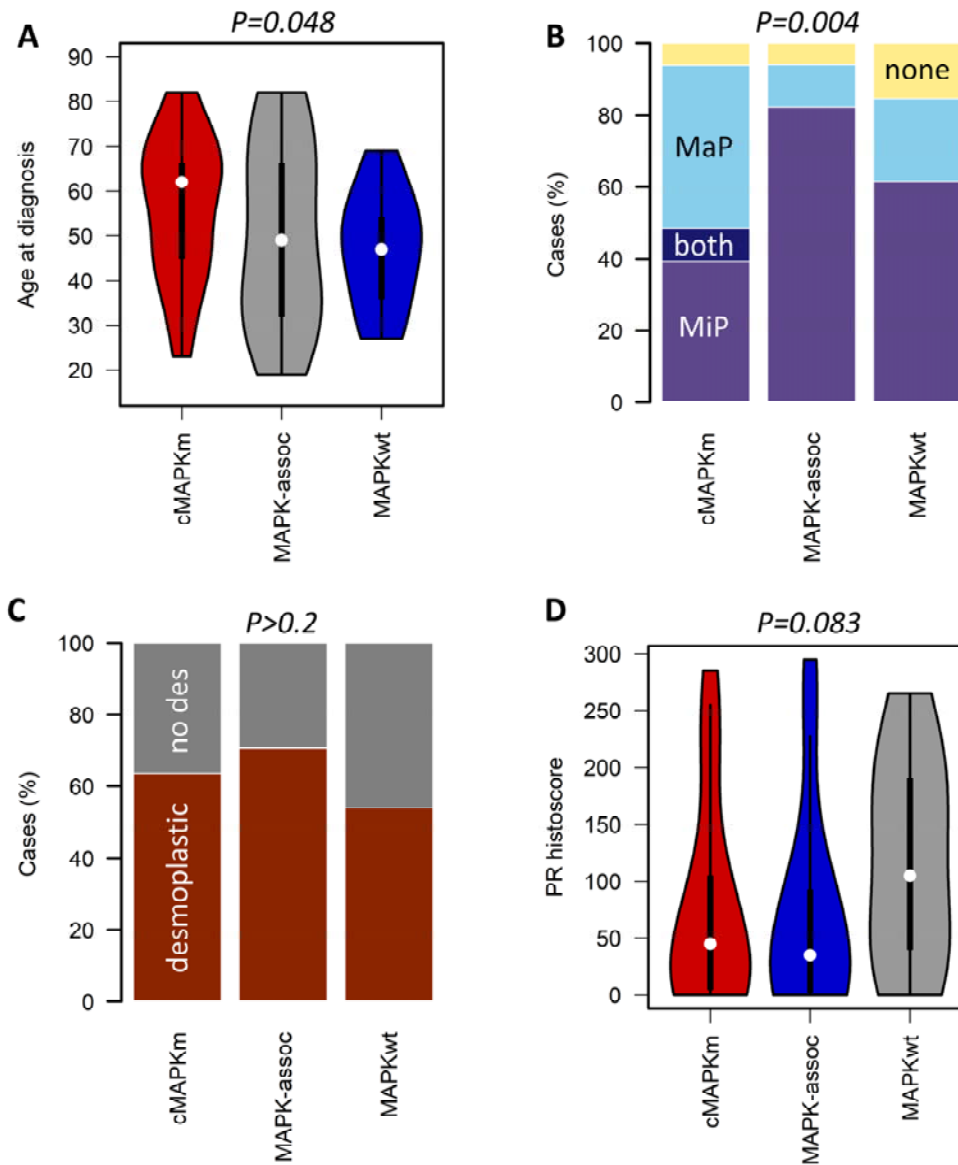

410

411 Figure 2. Characteristics of genomic subgroups in low grade serous ovarian carcinoma. (A)  
 412 Patient age at diagnosis across genomic subgroups; labelled P value represents the comparison  
 413 between the canonical MAPK mutation (cMAPKm) group and the MAPK wild-type (MAPKwt)  
 414 group. (B) Histopathological patterns across genomic subgroups; labelled P value represents  
 415 comparison of MaP frequency in cMAPKm versus subgroups by Chi-squared test. (C)  
 416 Desmoplasia across genomic subgroups; labelled P value represents comparison of  
 417 desmoplasia frequency between all subgroups by Chi-squared test. (D) Progesterone receptor  
 418 (PR) expression across genomic subgroups; labelled P value represents comparison of MAPKwt  
 419 group versus other subgroups by Mann Whitney-U test. MiP: micropapillary; MaP:  
 420 macropapillary. No des = no desmoplasia identified.

421

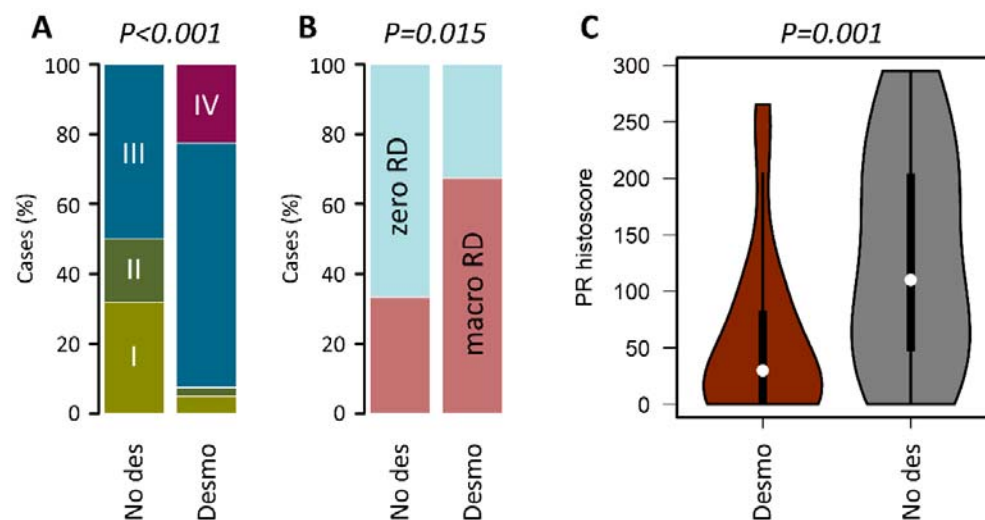

422

423 Figure 3. Features associated with desmoplasia in low grade serous ovarian carcinoma. (A)  
424 Distribution of stage at diagnosis between tumours with and without desmoplasia. (B) Distribution  
425 of stage at diagnosis between tumours with and without desmoplasia. (C) Progesterone receptor  
426 (PR) expression between cases with and without desmoplasia. Desmo = desmoplastic; No des =  
427 no desmoplasia identified; zero RD = zero macroscopic residual disease after debulking surgery;  
428 macro RD = macroscopic residual disease after debulking surgery.

429



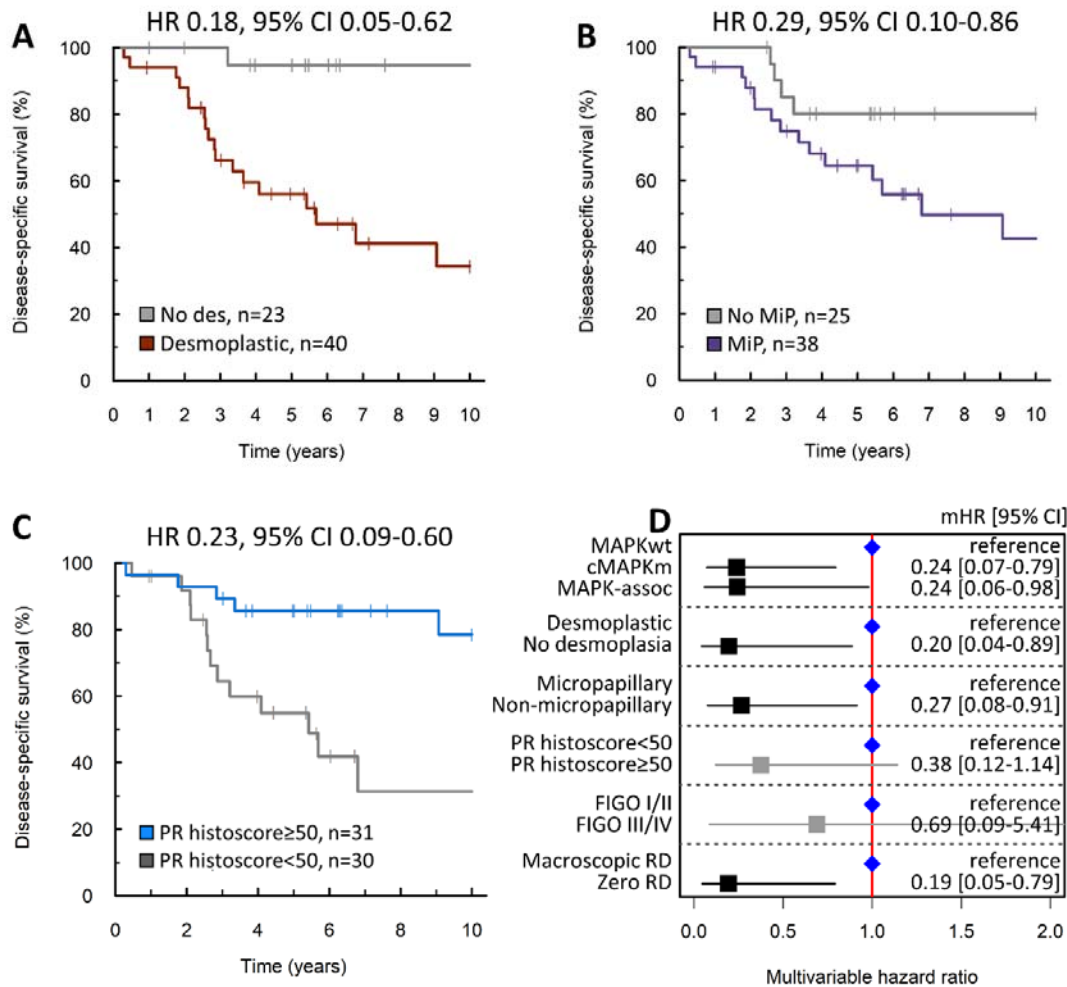

430

431 Figure 4. Impact of low grade serous ovarian carcinoma features on disease-specific survival. (A)  
 432 Disease-specific survival (DSS) of patients with tumours demonstrating desmoplasia. (B) DSS of  
 433 patients with tumours demonstrating the micropapillary (MiP) pattern of invasion. (C) DSS of  
 434 patients with tumours expressing progesterone receptor (PR). (D) Forest plot summarising  
 435 multivariable survival analysis of low grade serous ovarian carcinoma features. HR, hazard ratio;  
 436 95% CI, 95% confidence interval; mHR, multivariable HR; no des, no desmoplasia identified; RD,  
 437 residual disease; cMAPKm, canonical MAPK pathway mutation (KRAS/BRAF/NRAS); MAPK-  
 438 assoc, MAPK-associated mutation; MAPKwt, MAPK pathway wild-type.
